# Supplementary material for: A label-free fluorescence DNA probe based on ligation reaction with quadruplex formation for highly sensitive and selective detection of nicotinamide adenine dinucleotide
Source: Royal Society of Chemistry journal article supplement (doi:10.1039/c2cc30540b), 2012-01-01
Supplement: c2cc30540b.pdf [file c2cc30540b.pdf]

## Electronic Supplementary Information (ESI)

### **A label-free fluorescence DNA probe based on ligation reaction with quadruplex formation for highly sensitive and selective detection of nicotinamide adenine dinucleotide**

**Jingjin Zhao, Liangliang Zhang, Jianhui Jiang, Guoli Shen, Ruqin Yu\***

*State Key Laboratory for Chemo/Biosensing and Chemometrics, College of Chemistry and Chemical  
Engineering, Hunan University, Changsha 410082, P. R. China.*

*E-mail: rquyu@hnu.edu.cn*

#### **1. Experimental Section**

##### **Chemicals and Materials**

The synthetic oligonucleotide, adenosine triphosphate (ATP), adenosine diphosphate (ADP), adenosine monophosphate (AMP), and nicotinamide adenine dinucleotide phosphate (NADP) were obtained from Shanghai Sangon Biological Engineering Technology & Services Co., Ltd. (Shanghai, China). *Escherichia coli* DNA ligase was purchased from Takara Biotechnology Co., Ltd. (Dalian, China). Klenow Fragment (exo-) and dNTPs were obtained from New England Biolabs, Inc. (Beverly, MA, USA). Nicotinamide adenine dinucleotide (NAD<sup>+</sup>), the reduced form of nicotinamide adenine dinucleotide (NADH) and nicotinamide adenine dinucleotide phosphate hydride (NADPH) were purchased from Sigma-Aldrich Chemical Co.. N-methyl mesoporphyrin IX (NMM) was purchased from Porphyrin Products Inc (Logan, UT), and its

concentration was measured by absorbance at 379 nm assuming an extinction coefficient of  $1.45 \times 10^5 \text{ m}^{-1} \text{ cm}^{-1}$ . All the other chemicals were of analytical reagent grade and used without further purification. All solutions were prepared in Milli-Q water (resistance >18 M $\Omega$ ·cm) from a Millipore system. The pH measurements were carried out on a Mettler-Toledo Delta 320 pH meter.

### Fluorescence Measurements

All fluorescence measurements were carried out on an F-7000 spectrometer (Hitachi, Japan). The instrument settings were chosen as follows:  $\lambda_{\text{ex}} = 399 \text{ nm}$  (bandpass 5 nm),  $\lambda_{\text{em}} = 610 \text{ nm}$  (bandpass 5 nm), PMT detector voltage = 800 V. All measurements were performed in a buffer solution containing 30 mM Tris-HCl, 4 mM MgCl<sub>2</sub>, 10 mM (NH<sub>4</sub>)<sub>2</sub>SO<sub>4</sub> and 1.2 mM EDTA (pH=8.0).

### Assay Process

A mixture containing 500 nM oligonucleotide, 0.09 U/ $\mu\text{L}$  E.coli DNA ligase was prepared in a buffer (pH=8.0) of 50  $\mu\text{L}$  volume in the presence of varying concentrations of NAD<sup>+</sup>. The mixture was incubated at 37°C for 30 min. Then, 1  $\mu\text{L}$  dNTPs (10 mM/ $\mu\text{L}$ ) solution and 0.5  $\mu\text{L}$  Klenow Fragment (exo-) (5 U/ $\mu\text{L}$ ) polymerase solution were added into the mixture. After incubated again for 30 min, 1.2  $\mu\text{L}$  NMM (10  $\mu\text{M}$ ) solution, 0.8  $\mu\text{L}$  KCl (100 mM) solution and appropriate buffer were added and made the last volume of the solution was 80  $\mu\text{L}$ . Finally, the mixture solution was incubated at 37°C for 20 min. The fluorescence intensity of the mixture solution was measured in a 200  $\mu\text{L}$  quartz cuvette at room temperature.

## 2. Supplementary Figures

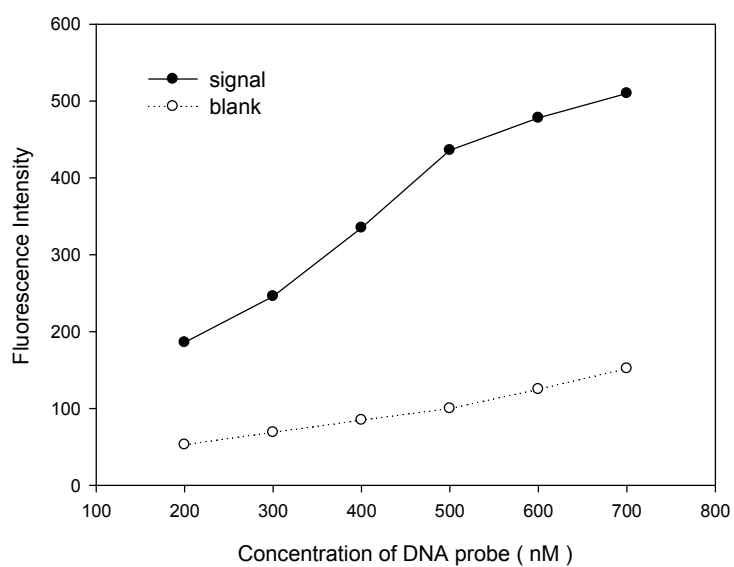

**Figure S1.** The effect of the concentration of oligonucleotide on the fluorescence response of the  $\text{NAD}^+$  sensing system for blank (dotted line) and 500 nM  $\text{NAD}^+$  (solid line).

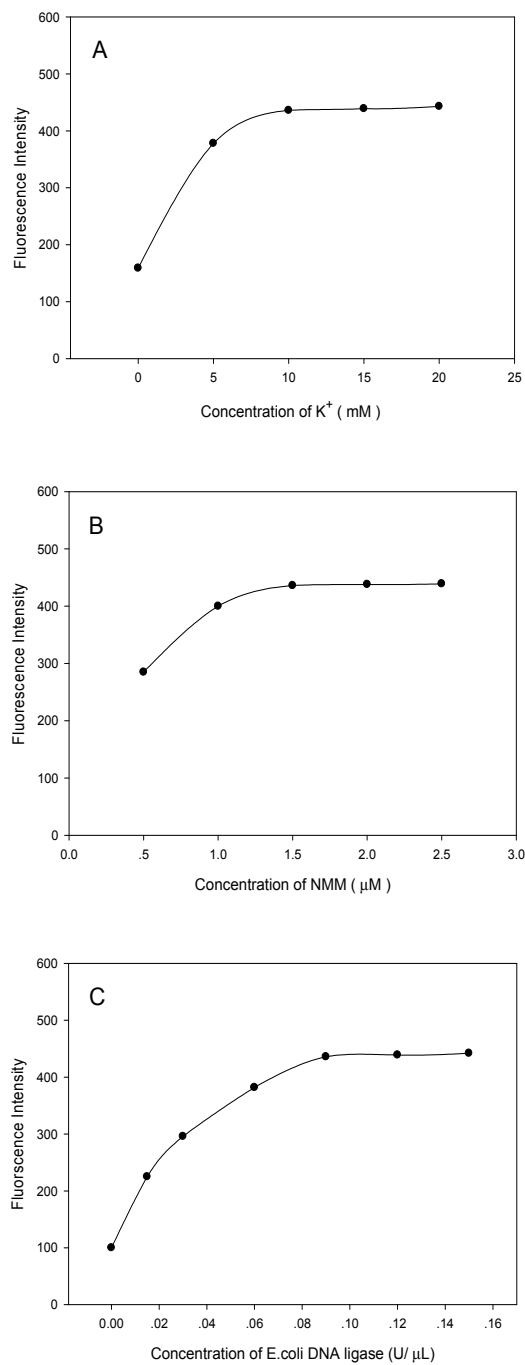

**Figure S2.** The effect of (A) the concentration of K<sup>+</sup>, (B) the concentration of NMM and (C) the concentration of *E. coli* DNA ligase on the fluorescence response of the NAD<sup>+</sup> sensing system. The concentration of NAD<sup>+</sup> is 500 nM.

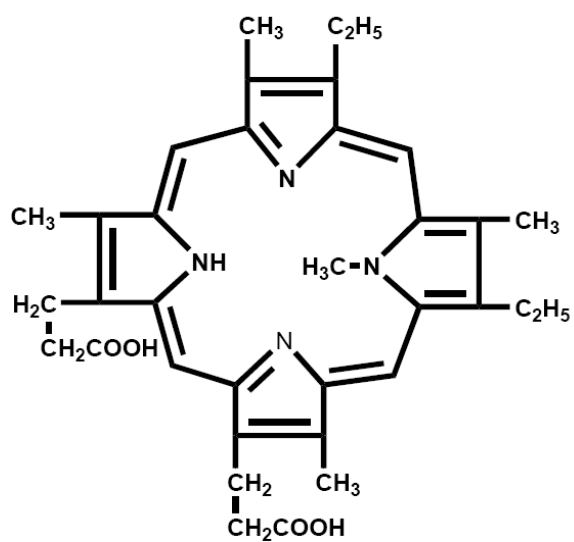

**Figure S3.** Molecular structure of NMM.
